# Supplementary material for: Inductively powered wireless pacing via a miniature pacemaker and remote stimulation control system
Source: PubMed Central journal article supplement (PMC5522478; doi:10.1038/s41598-017-06493-5), 2017-07-21

## Supplementary Information:

# Inductively Powered Wireless Pacing via a Miniature Pacemaker and Remote Stimulation Control System

Parinaz Abiri <sup>a,b</sup>, Ahmad Abiri <sup>b</sup>, René R. Sevag Packard <sup>a</sup>, Yichen Ding <sup>a,b</sup>, Alireza Yousefi <sup>c</sup>, Jianguo Ma <sup>a,1</sup>, Malcolm Bersohn <sup>d</sup>, Kim-Lien Nguyen <sup>d</sup>, Dejan Markovic <sup>c</sup>, Shervin Moloudi <sup>c</sup>, Tzung K. Hsiai <sup>a,b\*</sup>

<sup>a</sup> Department of Medicine, David Geffen School of Medicine at UCLA, Los Angeles, CA 90095, USA

<sup>b</sup> Department of Bioengineering, School of Engineering and Applied Sciences, UCLA, Los Angeles, CA 90095, USA

<sup>c</sup> Department of Electrical Engineering, School of Engineering and Applied Sciences, UCLA, Los Angeles, CA 90095, USA

<sup>d</sup> VA Greater Los Angeles Healthcare System, 11301 Wilshire Blvd, Los Angeles, CA 90073, USA

\*Corresponding Author: [THsiai@mednet.ucla.edu](mailto:THsiai@mednet.ucla.edu)

### This file includes:

**Video 1: Video recording of cardiac pacing post-euthanasia.** Pacing via the remote-controlled wireless pacemaker results in cardiac contractions. When pacing is deactivated, contraction ceases

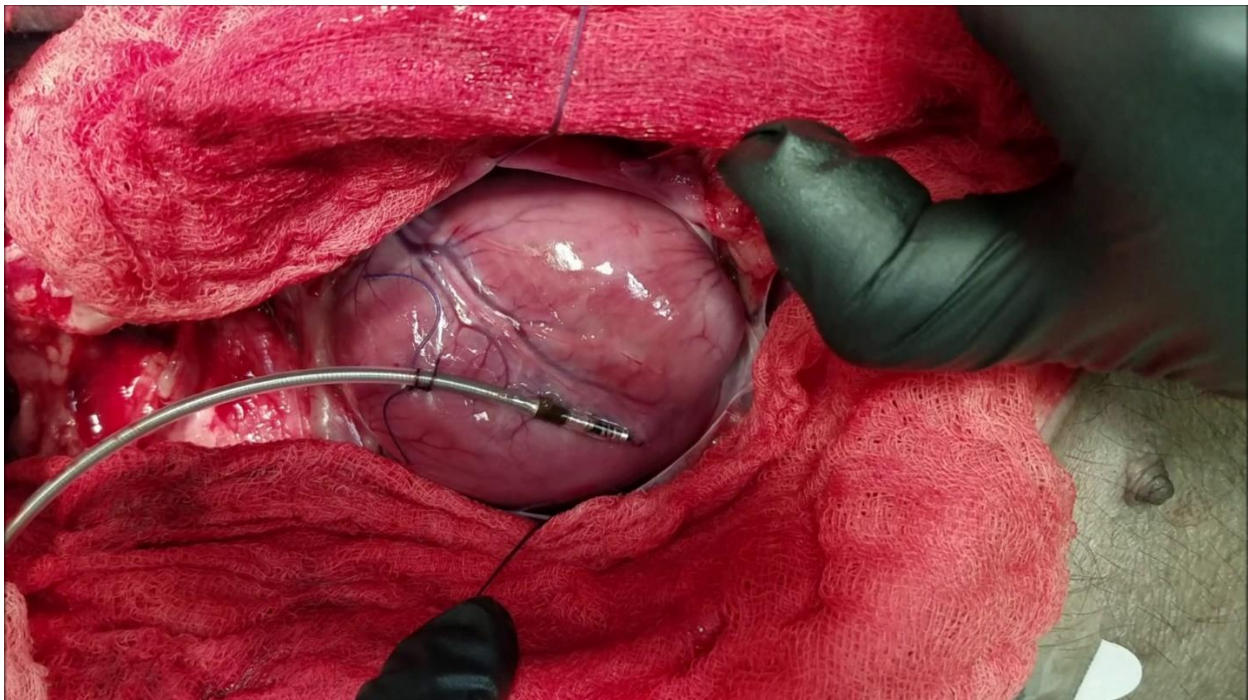

Supplement: 41598_2017_6493_MOESM2_ESM.pdf [file 41598_2017_6493_MOESM2_ESM.pdf]
